# Supplementary material for: Growth Factor Quantification of Platelet-Rich Plasma in Burn Patients Compared to Matched Healthy Volunteers
Source: MDPI journal article supplement (doi:10.3390/ijms20020288), 2019-01-12
Supplement: s1 [file s1]

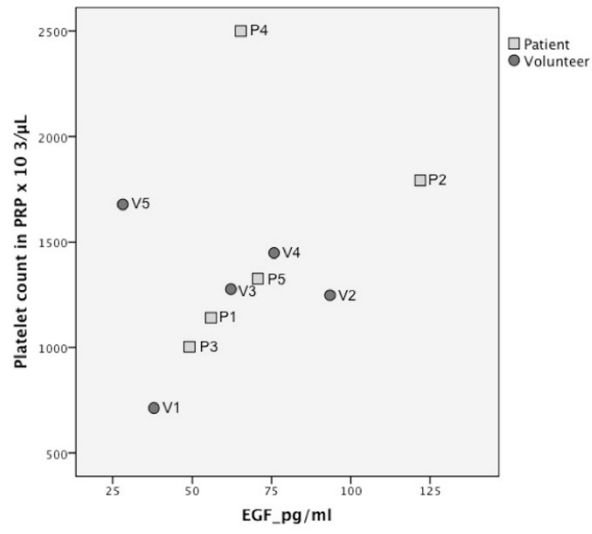

Figure S1. Growth factor quantification per platelet count in PRP for EGF.

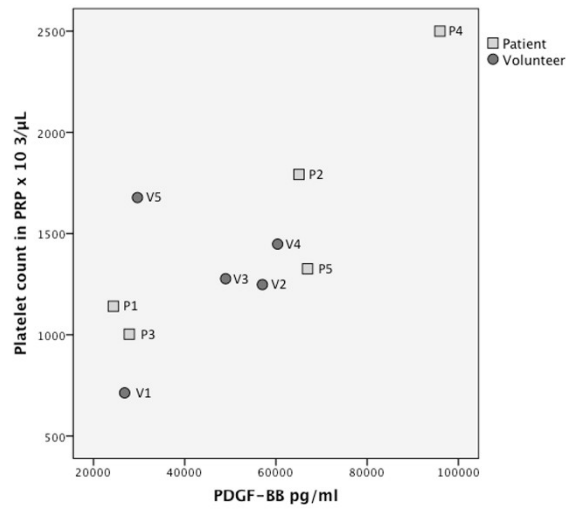

Figure S2. Growth factor quantification per platelet count in PRP for PDGF BB.

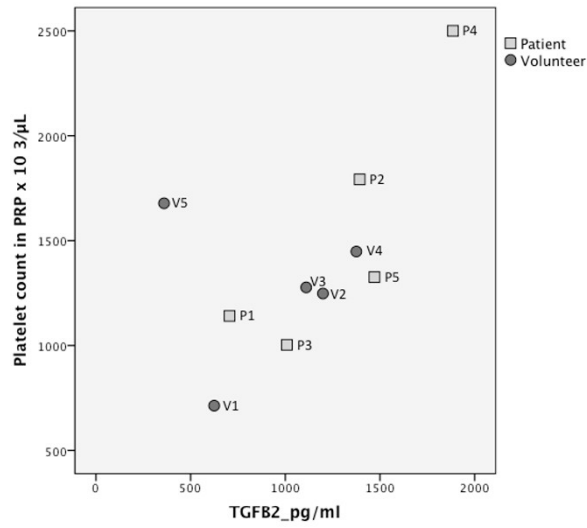

**Figure S3.** Growth factor quantification per platelet count in PRP for TGFβ2.

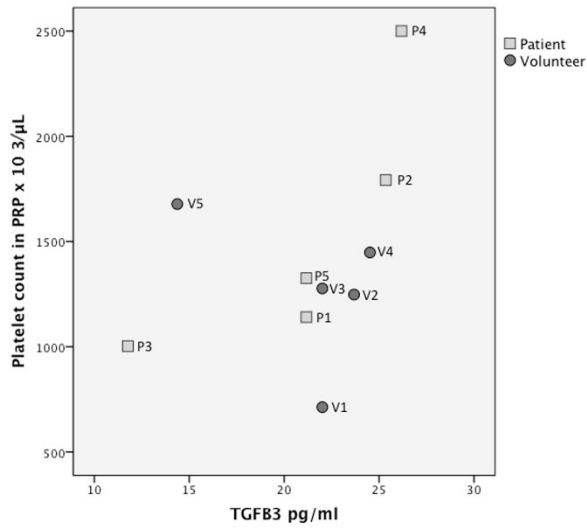

**Figure S4.** Growth factor quantification per platelet count in PRP for TGFβ3.

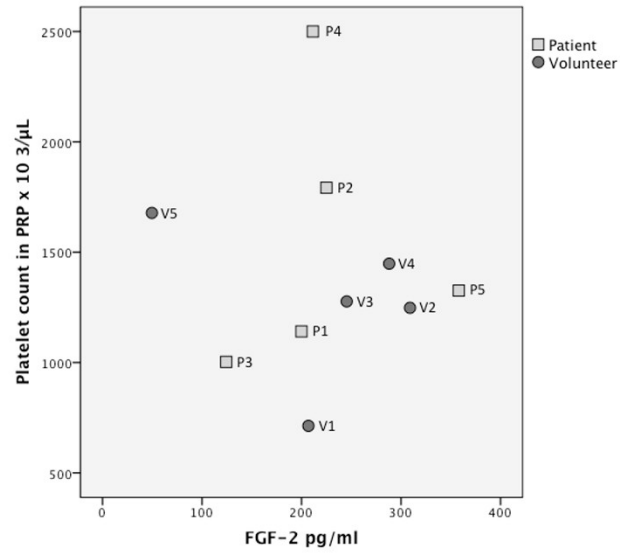

Figure S5. Growth factor quantification per platelet count in PRP for FGF-2.
